# Supplementary material
Source: PubMed Central journal article supplement (PMC5003422)
Supplement: NIHMS800684-supplement-01.pdf [file NIHMS800684-supplement-01.pdf]

## SUPPLEMENTAL MATERIAL

**Figure S1.** Results of functional connectivity analysis with the amygdala seed region of interest (ROI) without the use of global signal regressor. Note: Top panel (A-C): Significant clusters of connectivity with left amygdala seed. (A) Within-group typical development (TD); (B) Within-group autism spectrum disorder (ASD); (C) Between-group difference ASD<TD. Bottom panel (D-F): Significant clusters of connectivity with right amygdala seed. (D) Within-group TD; (E) Within-group ASD; (F) Between-group difference ASD<TD. All significant clusters are  $p < .05$ , corrected; clusters are overlaid on representative 3.5-year-old structural brain image; shown in radiological convention (Left=Right).

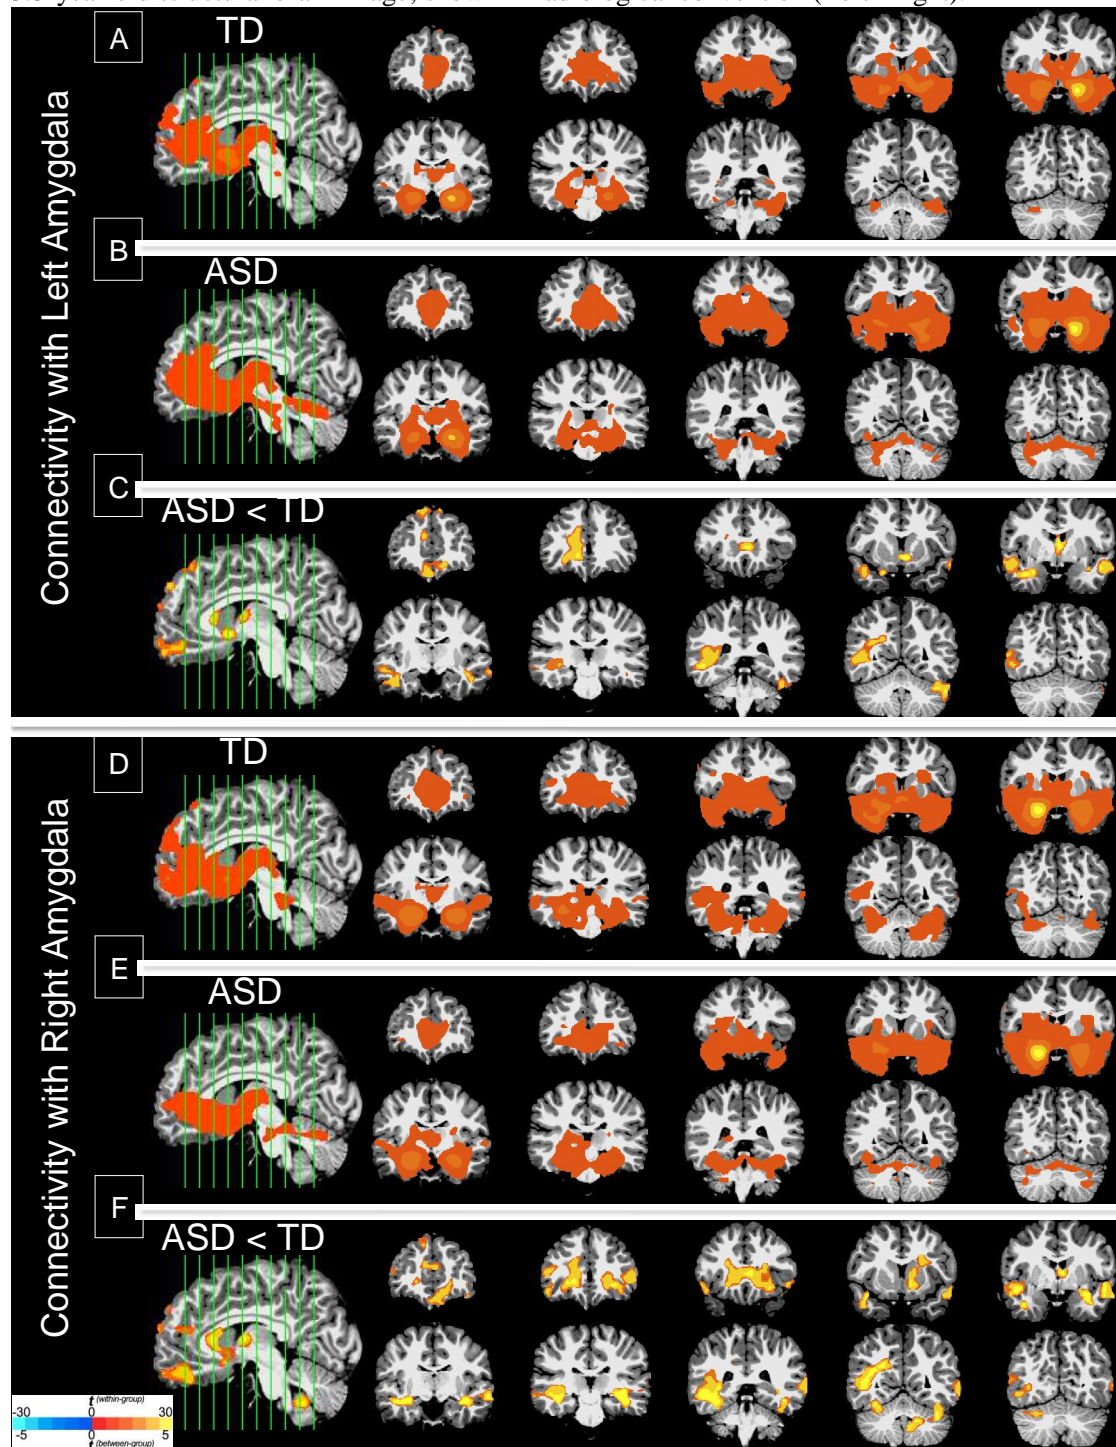

**Figure S2.** Results of functional connectivity analysis with the primary visual cortex seed region of interest (ROI) without the use of global signal regressor. Note: Significant clusters of connectivity with visual cortex seed. (A) Within-group typically developing (TD); (B) Within-group autism spectrum disorder (ASD); (C) Between-group difference ASD<TD. All significant clusters are  $p < .05$ , corrected; clusters are overlaid on representative 3.5-year-old structural brain image; shown in radiological convention (Left=Right).

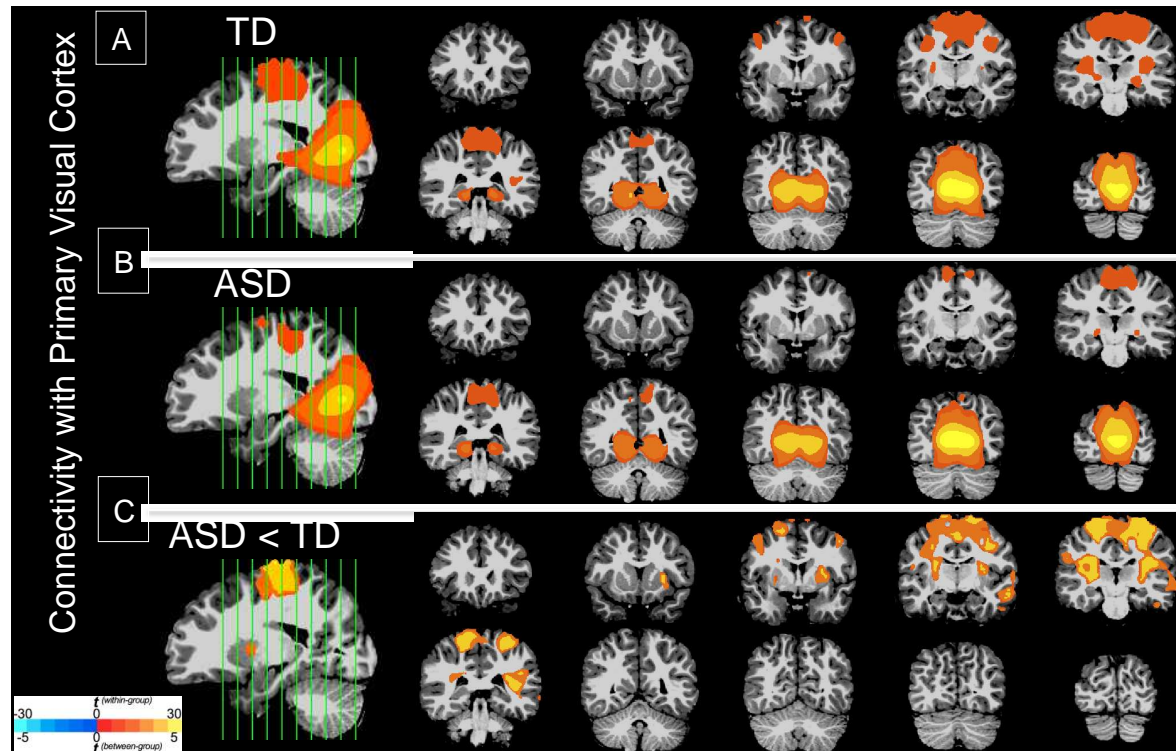

**Table S1. Regions Showing Functional Connectivity With Left Amygdala for Within Typically Developing (TD), Within Autism Spectrum Disorder (ASD), and Group Comparison (TD>ASD)**

| ASD Group (n=43)                                                |         |        |       |     |     |     | TD Group (n=29)                          |         |        |       |    |     |     |
|-----------------------------------------------------------------|---------|--------|-------|-----|-----|-----|------------------------------------------|---------|--------|-------|----|-----|-----|
| Peak Location                                                   | #voxels | Peak t | x     | y   | z   |     | Peak Location                            | #voxels | Peak t | x     | y  | z   |     |
| Additional regions [% volume of cluster]                        |         |        |       |     |     |     | Additional regions [% volume of cluster] |         |        |       |    |     |     |
| <b>L Insula Lobe</b>                                            | 4.0     | 4109   | 36.91 | -6  | 3   | -9  | <b>L Temporal Pole</b>                   | 3.2     | 3350   | 30.67 | -4 | 1   | -9  |
| L Anterior Cingulate Cortex                                     | 3.4     |        |       |     |     |     | L Caudate Nucleus                        | 3.1     |        |       |    |     |     |
| R Putamen                                                       | 3.1     |        |       |     |     |     | R Caudate Nucleus                        | 3.1     |        |       |    |     |     |
| L Putamen                                                       | 2.9     |        |       |     |     |     | R ParaHippocampal Gyrus                  | 3.0     |        |       |    |     |     |
| L Temporal Pole                                                 | 2.9     |        |       |     |     |     | L Anterior Cingulate Cortex              | 2.9     |        |       |    |     |     |
| R ParaHippocampal Gyrus                                         | 2.5     |        |       |     |     |     | R Hippocampus                            | 2.9     |        |       |    |     |     |
| R Caudate Nucleus                                               | 2.4     |        |       |     |     |     | L Hippocampus                            | 2.9     |        |       |    |     |     |
| L ParaHippocampal Gyrus                                         | 2.3     |        |       |     |     |     | L Fusiform Gyrus                         | 2.8     |        |       |    |     |     |
| L Hippocampus                                                   | 2.2     |        |       |     |     |     | R Temporal Pole                          | 2.7     |        |       |    |     |     |
| L Caudate Nucleus                                               | 2.2     |        |       |     |     |     | L ParaHippocampal Gyrus                  | 2.6     |        |       |    |     |     |
| R Hippocampus                                                   | 2.1     |        |       |     |     |     | L Insula Lobe                            | 2.3     |        |       |    |     |     |
| L Inf. Temporal Gyrus                                           | 2.0     |        |       |     |     |     | L Cerebellum                             | 2.2     |        |       |    |     |     |
| L Fusiform Gyrus                                                | 2.0     |        |       |     |     |     | R Anterior Cingulate Cortex              | 2.0     |        |       |    |     |     |
| <b>R Fusiform Gyrus</b>                                         | 75.1    | 6      | 5.56  | 41  | -45 | -13 | <b>R Fusiform Gyrus</b>                  | 65.0    | 12     | 5.38  | 33 | -47 | -19 |
| R Inf. Temporal Gyrus                                           | 8.7     |        |       |     |     |     | R Cerebellum                             | 35.0    |        |       |    |     |     |
| <b>R Cerebellum</b>                                             | 100.0   | 4      | 5.14  | 31  | -62 | -31 | <b>R Cerebellum</b>                      | 100.0   | 10     | 5.88  | 27 | -66 | -28 |
| <b>L Middle Occipital Gyrus</b>                                 | 100.0   | 3      | 5.11  | -25 | -96 | 3   | <b>L Sup. Medial Gyrus</b>               | 100.0   | 4      | 5.52  | -8 | 44  | 52  |
| <b>TD&gt;ASD Comparison</b>                                     |         |        |       |     |     |     |                                          |         |        |       |    |     |     |
| Peak Location                                                   | #voxels | Peak t | x     | y   | z   |     |                                          |         |        |       |    |     |     |
| Additional regions [% volume of cluster]                        |         |        |       |     |     |     |                                          |         |        |       |    |     |     |
| <b>R Sup. Medial Frontal Gyrus<sup>a</sup></b>                  | 21.9    | 523    | 5.07  | 12  | 44  | 19  |                                          |         |        |       |    |     |     |
| R Sup. Frontal Gyrus                                            | 13.9    |        |       |     |     |     |                                          |         |        |       |    |     |     |
| R Anterior Cingulate Cortex                                     | 10.7    |        |       |     |     |     |                                          |         |        |       |    |     |     |
| L Sup. Medial Frontal Gyrus                                     | 6.3     |        |       |     |     |     |                                          |         |        |       |    |     |     |
| L Sup. Frontal Gyrus                                            | 4.7     |        |       |     |     |     |                                          |         |        |       |    |     |     |
| R Sup. Orbital Frontal Gyrus                                    | 3.0     |        |       |     |     |     |                                          |         |        |       |    |     |     |
| R Inf. Frontal Gyrus                                            | 2.5     |        |       |     |     |     |                                          |         |        |       |    |     |     |
| R Middle Frontal Gyrus                                          | 2.2     |        |       |     |     |     |                                          |         |        |       |    |     |     |
| <b>R Middle Temporal Gyrus</b>                                  | 32.0    | 580    | 4.49  | 47  | -27 | -3  |                                          |         |        |       |    |     |     |
| R Sup. Temporal Gyrus                                           | 16.1    |        |       |     |     |     |                                          |         |        |       |    |     |     |
| R Inf. Temporal Gyrus                                           | 4.4     |        |       |     |     |     |                                          |         |        |       |    |     |     |
| R Temporal Pole                                                 | 4.3     |        |       |     |     |     |                                          |         |        |       |    |     |     |
| R Hippocampus                                                   | 3.3     |        |       |     |     |     |                                          |         |        |       |    |     |     |
| <b>L Middle Temporal Gyrus</b>                                  | 45.3    | 149    | 4.17  | -48 | -10 | -13 |                                          |         |        |       |    |     |     |
| L Sup. Temporal Gyrus                                           | 10.6    |        |       |     |     |     |                                          |         |        |       |    |     |     |
| L Hippocampus                                                   | 6.0     |        |       |     |     |     |                                          |         |        |       |    |     |     |
| L Temporal Pole                                                 | 4.7     |        |       |     |     |     |                                          |         |        |       |    |     |     |
| <b>L Middle Orbital Gyrus</b>                                   | 28.2    | 133    | 4.06  | -4  | 50  | -14 |                                          |         |        |       |    |     |     |
| L Rectal Gyrus                                                  | 16.1    |        |       |     |     |     |                                          |         |        |       |    |     |     |
| R Rectal Gyrus                                                  | 14.6    |        |       |     |     |     |                                          |         |        |       |    |     |     |
| R Mid Orbital Gyrus                                             | 8.3     |        |       |     |     |     |                                          |         |        |       |    |     |     |
| L Sup. Orbital Gyrus                                            | 7.3     |        |       |     |     |     |                                          |         |        |       |    |     |     |
| L Inf. Frontal Gyrus                                            | 5.5     |        |       |     |     |     |                                          |         |        |       |    |     |     |
| R Sup. Orbital Gyrus                                            | 2.0     |        |       |     |     |     |                                          |         |        |       |    |     |     |
| <b>L Cerebellum</b>                                             | 58.3    | 116    | 4.45  | -45 | -48 | -28 |                                          |         |        |       |    |     |     |
| L Inf. Temporal Gyrus                                           | 28.0    |        |       |     |     |     |                                          |         |        |       |    |     |     |
| L Fusiform Gyrus                                                | 11.7    |        |       |     |     |     |                                          |         |        |       |    |     |     |
| <b>L Caudate Nucleus</b>                                        | 14.0    | 59     | 4.11  | -2  | 2   | 4   |                                          |         |        |       |    |     |     |
| L Thalamus                                                      | 2.6     |        |       |     |     |     |                                          |         |        |       |    |     |     |
| L Olfactory cortex                                              | 2.0     |        |       |     |     |     |                                          |         |        |       |    |     |     |
| <b>Cerebellum</b>                                               | 85.7    | 51     | 3.49  | -9  | -49 | -43 |                                          |         |        |       |    |     |     |
| <sup>a</sup> Denotes cluster reported in behavior correlations. |         |        |       |     |     |     |                                          |         |        |       |    |     |     |
